# Supplementary material for: Catalytic aerobic oxidation of lignin-based vanillyl alcohol under base–free conditions over an efficient and reusable LaFeO3 perovskite for vanillin production
Source: Royal Society of Chemistry journal article supplement (doi:10.1039/d2gc04132d), 2023-01-01
Supplement: d2gc04132d1.pdf [file d2gc04132d1.pdf]

## Electronic Supplementary Information

Catalytic aerobic oxidation of lignin-based vanillyl alcohol in  
base-free condition over efficient and reusable LaFeO<sub>3</sub>  
perovskite for vanillin production

Yaohong Zhou,<sup>a</sup> Wanming Xiong,<sup>a,\*</sup> Yujing Jin,<sup>b</sup> Peng Wang,<sup>b</sup> Weiqi Wei,<sup>c</sup> Jiliang  
Ma,<sup>d</sup> Xiaohua Zhang<sup>a,\*</sup>

<sup>a</sup> *College of Chemistry and Materials, Jiangxi Agricultural University, Nanchang 330045, People's  
Republic of China*

<sup>b</sup> *College of Forestry, East China Woody Fragrance and Flavor Engineering Research Center of  
National Forestry and Grassland Administration, Jiangxi Agricultural University, Nanchang  
330045, People's Republic of China*

<sup>c</sup> *Jiangsu Co-Innovation Center of Efficient Processing and Utilization of Forest Resources,  
Nanjing Forestry University, Nanjing 210037, China*

<sup>d</sup> *Liaoning Key Laboratory of Lignocellulosic Chemistry and Biomaterials, College of Light Industry  
and Chemical Engineering, Dalian Polytechnic University, Dalian 116034, People's Republic of  
China*

---

\*Corresponding author.

E-mail address: [xiongwm10@163.com](mailto:xiongwm10@163.com), [xiaohuazhang0417@163.com](mailto:xiaohuazhang0417@163.com)

### ***S1 Bio-oil characterization***

Gas chromatograph (GC) using flame ionization detector (FID) equipped with a DB-5 capillary column, which determines the yield of vanillin *via* an external standard method through injecting the corresponding authentic compound. The GC detection conditions: Helium (99.99%) was used as the carrier gas at a flow rate was 1.20 mL min<sup>-1</sup>. The injector, detector and interface temperature were all set to 260°C. All the samples were filtered through a 0.45 µm syringe-driven filter before injection, and the injection volume was 1 µL. The sample injection was performed at a split ratio of 1:1, and the oven temperature was programmed from 60°C (kept for 2 min) to 260°C (kept for 2 min) with a 20°C min<sup>-1</sup> heating rate.

### ***S2 Catalysts characterization method***

The XRD patterns were recorded in the 2θ range of 10~80° with a scanning size of 4°/min and counting time on a PuXi XRD-3X using Cu Kα (λ=1.54056 Å) radiation under the operation of 40 kV and 30 mA. Crystal phases were identified by comparison with reference patterns from the JCPDS database. FTIR analysis by using a Spectrum Two transform infrared spectrometer (PerkinElmer). The sample and KBr was ground at a mass ratio of 1:100. Spectra was recorded in the wavenumber range of 500 to 4000 cm<sup>-1</sup> with a resolution of 4 cm<sup>-1</sup>, and each sample was performed for 16 scans. The appearance and internal structure of all samples was obtained using a scanning electron microscope (SEM). X-ray photoelectron spectrometer (XPS) spectra was obtained using a PerkinElmer PHI 1600 ESCA system with Mg Kα 1253.6 eV radiation as the excitation source. The spectra was collected at ambient temperature with an ultra-high vacuum. The binding energy of C1s (284.6 eV) was used as internal reference. The core levels of La 3d, O 1s, and Fe 2p species were recorded and their relative intensities were determined from the integration

of the Gaussian deconvolution signals by curve fitting. Raman scattering spectra was observed by using a microprobed Raman system with a back scattering configuration. The laser beam exited at 532 nm was focused to 2  $\mu\text{m}$  in spot size on a sample surface. The scattered light was analyzed by a triple grating monochromator with a charge coupled detector. The temperature was controlled within 0.1 K. Thermogravimetric analysis under air atmosphere (air-TG) was performed using Perkin Elmer TGA-4000. In each experiment, the thermal stability and the amount of carbon deposited on surface of catalysts were determined by testing 3~5 mg sample in platinum crucible under air atmosphere (99.999%, flow rate of 19.8 mL min<sup>-1</sup>) at a constant heating rate of 10°C min<sup>-1</sup>, and first heated from room temperature to 105°C and remained for 15 min to remove absorbed moisture during operation. Afterwards, the sample was heated again from 105°C to 700°C at the same heating rate. The weight loss curves and differential curves were drawn automatically by the system software through the computer.

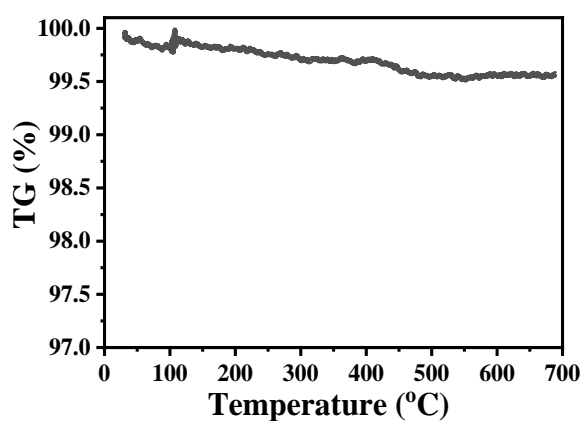

**Fig. S1.** Thermal stability of LaFeO<sub>3</sub> under air atmosphere.

**Table S1** Main compounds (relative peak area-%) identified in bio-oil by GC–MS

| Catalyst dosage (g) | Retention time (min) | Area (%) | Main compounds                                         | Matching index |
|---------------------|----------------------|----------|--------------------------------------------------------|----------------|
| 0                   | 13.491               | 42.76    | Vanillin                                               | 96             |
|                     | 14.846               | 48.19    | Benzeneacetic acid, 4-hydroxy-3-methoxy-, methyl ester | 76             |
|                     | 16.127               | 3.73     | Vanillic acid                                          | 43             |
| 0.1                 | 13.491               | 44.66    | Vanillin                                               | 96             |
|                     | 14.843               | 42.73    | Benzeneacetic acid, 4-hydroxy-3-methoxy-, methyl ester | 70             |
|                     | 16.128               | 7.68     | Vanillic acid                                          | 43             |
| 0.2                 | 13.491               | 36.19    | Vanillin                                               | 96             |
|                     | 14.845               | 46.47    | Benzeneacetic acid, 4-hydroxy-3-methoxy-, methyl ester | 64             |
|                     | 16.127               | 11.45    | Vanillic acid                                          | 43             |
| 0.3                 | 12.108               | 12.65    | Vanillin                                               | 96             |
|                     | 13.555               | 84.43    | Benzeneacetic acid, 4-hydroxy-3-methoxy-, methyl ester | 58             |
|                     | 14.943               | 2.31     | Vanillic acid                                          | 46             |
| 0.4                 | 12.109               | 10.69    | Vanillin                                               | 96             |
|                     | 13.556               | 86.24    | Benzeneacetic acid, 4-hydroxy-3-methoxy-, methyl ester | 52             |
|                     | 14.943               | 2.31     | Vanillic acid                                          | 43             |
| 0.5                 | 13.491               | 28.77    | Vanillin                                               | 96             |
|                     | 14.847               | 59.05    | Benzeneacetic acid, 4-hydroxy-3-methoxy-, methyl ester | 76             |
|                     | 16.127               | 8.64     | Vanillic acid                                          | 43             |

**Table S2** Main compounds (relative peak area-%) identified in bio-oil by GC–MS

| Oxygen pressure (MPa) | Retention time (min) | Area (%) | Main compounds                                         | Matching index |
|-----------------------|----------------------|----------|--------------------------------------------------------|----------------|
| 0                     | 14.144               | 31.66    | 4-Hydroxy-3-methoxybenzyl alcohol                      | 98             |
|                       | 14.848               | 56.9     | Benzeneacetic acid, 4-hydroxy-3-methoxy-, methyl ester | 64             |
| 0.4                   | 13.505               | 8.47     | Vanillin                                               | 96             |
|                       | 14.854               | 86.57    | Benzeneacetic acid, 4-hydroxy-3-methoxy-, methyl ester | 49             |
|                       | 16.13                | 2.25     | Vanillic acid                                          | 43             |
| 0.8                   | 13.491               | 26.82    | Vanillin                                               | 96             |
|                       | 14.849               | 64.19    | Benzeneacetic acid, 4-hydroxy-3-methoxy-, methyl ester | 52             |
|                       | 16.128               | 7.57     | Vanillic acid                                          | 43             |
| 1.0                   | 13.491               | 44.66    | Vanillin                                               | 96             |
|                       | 14.843               | 42.73    | Benzeneacetic acid, 4-hydroxy-3-methoxy-, methyl ester | 70             |
|                       | 16.128               | 7.68     | Vanillic acid                                          | 43             |
| 1.2                   | 13.49                | 35.71    | Vanillin                                               | 96             |
|                       | 14.848               | 52.54    | Benzeneacetic acid, 4-hydroxy-3-methoxy-, methyl ester | 64             |
|                       | 16.127               | 7.74     | Vanillic acid                                          | 43             |
| 1.6                   | 13.49                | 45.97    | Vanillin                                               | 96             |
|                       | 14.843               | 6.53     | 4-Hydroxy-3-methoxybenzyl alcohol, di(propyl) ether    | 46             |
|                       | 16.127               | 13.14    | Vanillic acid                                          | 43             |

**Table S3** Comparison of our work and previous studies (mostly) in recent 10 years for the preparation of vanillin from vanillyl alcohol

| Catalysts                                                            | Solvents          | Conditions                                                            | Conv. (%) | Yield (%) | Refs. | Year |
|----------------------------------------------------------------------|-------------------|-----------------------------------------------------------------------|-----------|-----------|-------|------|
| TiO <sub>2</sub> P25 Degussa (ca. 80% anatase and 20% rutile)        | H <sub>2</sub> O  | Oxygen, 27°C, 30 min, three external 15W/10 Philips fluorescent lamps | 40        | 4         | 1     | 2012 |
| TiO <sub>2</sub> Merck (100% anatase)                                |                   | Air, 27°C, 1 h, three external 15W/10 Philips fluorescent lamps       | 19        | 3         |       |      |
| Manganese-doped cobalt mixed oxide                                   | Acetonitrile      | Air, 140°C, 2 h                                                       | 62        | 51        | 2     | 2013 |
| Co <sub>3</sub> O <sub>4</sub> nanoparticles                         | NaOH, Isopropanol | Air, 80°C, 6 h.                                                       | 80        | 78        | 3     | 2013 |
|                                                                      | Isopropanol       |                                                                       | 25        | 22        |       |      |
| nCo-MO                                                               | Acetonitrile      | Air, 120°C, 2 h                                                       | 7         | 0.4       | 4     | 2014 |
| Mixed metal cobalt titanium oxide                                    | NaOH              | H <sub>2</sub> O <sub>2</sub> , 85°C, 5 h                             | 99        | 67        | 5     | 2015 |
|                                                                      |                   |                                                                       | 94        | 57        |       |      |
| MnCl <sub>2</sub>                                                    | H <sub>2</sub> O  | H <sub>2</sub> O <sub>2</sub> , microwave irradiation, 80°C, 10 min   | 90        | 44        | 6     | 2015 |
| CoCl <sub>2</sub>                                                    |                   |                                                                       | 48.1      | 16        |       |      |
| Pt/CuCIP                                                             | tert-Butanol      | Air, 170, 10 h                                                        | 32        | 25        | 7     | 2015 |
| Mesoporous CuZrO <sub>3</sub> nanoparticles                          | Acetonitrile      | Air, 120°C, 2 h                                                       | 91        | 69        | 8     | 2017 |
| Cobalt-supported cobalt nanocomposite                                | Acetonitrile      | 85°C, H <sub>2</sub> O <sub>2</sub> , 1 h                             | -         | 50        | 9     | 2017 |
| 5.0%N-CNT/ZnO                                                        | H <sub>2</sub> O  | 10 W UV-LED irradiation, Ar, 20°C, 20 min                             | 46        | 11        | 10    | 2017 |
| Co <sub>3</sub> O <sub>4</sub>                                       | H <sub>2</sub> O  | Air, 120°C, H <sub>2</sub> O <sub>2</sub> , 15 min                    | 38        | 19        | 11    | 2017 |
| Nitrogen-doped reduced graphene oxide/Mn <sub>3</sub> O <sub>4</sub> | DMSO              | Air, 120°C, 12 h                                                      | 48        | 31        | 12    | 2017 |
|                                                                      | DMF               |                                                                       | 41        | 38        |       |      |
| Fe <sub>2</sub> O <sub>3</sub> /Al-SBA-15                            | Acetonitrile      | 50°C, H <sub>2</sub> O <sub>2</sub> , 2 h                             | 99        | 87        | 13    | 2018 |
| Al-SBA-15                                                            |                   |                                                                       | 10        | 9         |       |      |
| Cobalt nanoparticle-embedded carbon nanocomposite                    | Isopropanol       | Air, 140°C,                                                           | 94        | 46        | 14    | 2018 |
| ZrO <sub>2</sub>                                                     | Acetonitrile      | O <sub>2</sub> , 140°C, 5 h                                           | 30        | 29        | 15    | 2019 |
| CeO <sub>2</sub>                                                     |                   |                                                                       | 40        | 39        |       |      |

|                                                                                                |                              |                                                                                                  |     |    |              |      |
|------------------------------------------------------------------------------------------------|------------------------------|--------------------------------------------------------------------------------------------------|-----|----|--------------|------|
| CeO <sub>2</sub> +ZrO <sub>2</sub>                                                             |                              |                                                                                                  | 55  | 53 |              |      |
| CuO/MgFe <sub>2</sub> O <sub>4</sub>                                                           | Acetonitrile                 | H <sub>2</sub> O <sub>2</sub> , 90°C, 5 h                                                        | 53  | 25 | 16           | 2019 |
| Fe <sub>3</sub> [Fe(CN) <sub>6</sub> ] <sub>2</sub>                                            | Isopropanol                  | O <sub>2</sub> , 100°C, 2.5 h                                                                    | 70  | 31 | 17           | 2019 |
| Au-Pd@HT-PO <sub>4</sub> <sup>3-</sup>                                                         | 1,4-dioxane                  | Air, 30°C, 24 h,<br>visible-light<br>irradiation, 300 W<br>Xe arc lamp                           | 53  | 26 | 18           | 2019 |
| Eugenol oxidase-<br>agarose                                                                    | Glycine-<br>NaOH,<br>acetone | H <sub>2</sub> O <sub>2</sub> , 30°C, 30 h                                                       | 86  | 30 | 19           | 2019 |
| TEMPO@SiO <sub>2</sub> /CuBr                                                                   | Isopropanol                  | O <sub>2</sub> , 30°C, 30 min                                                                    | 96  | 93 | 20           | 2020 |
| Pd/C                                                                                           | p-Xylene                     | O <sub>2</sub> , 120°C, 24 h                                                                     | 72  | 72 | 21           | 2020 |
| Nanopetal copper<br>hydroxide nitrate                                                          | Isopropanol                  | Air, 120°C, 2,2,6,6-<br>tetramethylpiperidin-<br>oxyl (TEMPO), 2 h                               | 99  | 99 | 22           | 2021 |
| Pd/ZrO <sub>2</sub>                                                                            | Isopropanol                  | O <sub>2</sub> , 120°C, 4 h                                                                      | 69  | 60 | 23           | 2021 |
| Nanostructured<br>Bi <sub>2</sub> WO <sub>6</sub>                                              | 1,4-dioxane                  | O <sub>2</sub> , room<br>temperature, 16 h,<br>300 W xenon light<br>source ( $\lambda > 420$ nm) | 43  | 39 | 24           | 2021 |
| Au/ZnO-MZ                                                                                      |                              |                                                                                                  | 85  | 85 |              |      |
| Au/ZnO-NH <sub>3</sub>                                                                         |                              |                                                                                                  | 34  | 34 |              |      |
| Au/ZnO-NaOH                                                                                    | p-Xylene                     | O <sub>2</sub> , 120°C, 24 h                                                                     | 22  | 22 | 25           | 2022 |
| ZnO                                                                                            |                              |                                                                                                  | 0   | 0  |              |      |
|                                                                                                | Water                        |                                                                                                  | 40  | 38 |              |      |
|                                                                                                | Acetonitrile                 |                                                                                                  | 35  | 32 |              |      |
| NNS amine ligand<br>(Schiff base ligand)<br>with<br>copper(II) chloride<br>mononuclear complex | MeOH                         |                                                                                                  | 32  | 31 |              |      |
|                                                                                                | EtOH                         | Air, TEMPO, 40°C,<br>6 h                                                                         | 32  | 30 | 26           | 2022 |
|                                                                                                | THF                          |                                                                                                  | 32  | 30 |              |      |
|                                                                                                | EtOAc                        |                                                                                                  | 20  | 17 |              |      |
|                                                                                                | Acetone                      |                                                                                                  | 16  | 14 |              |      |
| LaFeO <sub>3</sub>                                                                             | EtOAc                        | O <sub>2</sub> , 180°C, 2 h                                                                      | 100 | 33 | This<br>work | 2022 |

**Table S4** The proportion (%) of La valence states of fresh, spent and regenerated LaFeO<sub>3</sub> determined by La 3d spectra

| Catalyst    | <i>BE/eV</i>  | <i>BE/eV</i>  | <i>BE/eV</i>  | <i>BE/eV</i>  |
|-------------|---------------|---------------|---------------|---------------|
| Fresh       | 834.3 (31.9%) | 837.9 (25.1%) | 851.0 (27.7%) | 854.9 (15.3%) |
| First run   | 834.8 (32.6%) | 838.5 (25.2%) | 851.2 (25.9%) | 855.1 (16.3%) |
| Fourth run  | 834.6 (32.4%) | 838.6 (26.6%) | 852.5 (22.5%) | 856.4 (18.5%) |
| Regenerated | 833.9 (33.7%) | 837.6 (25.3%) | 850.5 (23.4%) | 854.4 (17.6%) |



**Table S5** The proportion (%) of Fe valence states of fresh, spent and regenerated LaFeO<sub>3</sub> determined

by Fe 2p spectra

| Catalyst    | <i>BE/eV</i>  | <i>BE/eV</i>  | <i>BE/eV</i>  | <i>BE/eV</i>  |
|-------------|---------------|---------------|---------------|---------------|
| Fresh       | 710.0 (33.7%) | 711.4 (32.2%) | 723.4 (17.4%) | 725.2 (16.7%) |
| First run   | 710.4 (34.5%) | 712.1 (30.6%) | 724.1 (19.1%) | 724.9 (15.8%) |
| Fourth run  | -             | -             | -             | -             |
| Regenerated | 710.0 (25.2%) | 711.0 (36.5%) | 723.4 (17.7%) | 724.4 (20.6%) |

**Table S6** The proportion (%) of oxygen species of fresh, spent and regenerated LaFeO<sub>3</sub> determined by O 1s spectra

| Catalyst    | O <sub>H</sub> | O <sub>ads</sub> | O <sub>latt</sub> |
|-------------|----------------|------------------|-------------------|
|             | BE/eV          | BE/eV            | BE/eV             |
| Fresh       | -              | 531.1 (54.2%)    | 529.1 (45.8%)     |
| First run   | 533.0 (74.8%)  | 531.5 (14.8%)    | 529.7 (10.4%)     |
| Fourth run  | 533.1 (82.6%)  | 531.4 (13.2%)    | 530.0 (4.2%)      |
| Regenerated | -              | 531.1 (48.1%)    | 528.9 (51.9%)     |

### Supplementary references

1. V. Augugliaro, G. Camera-Roda, V. Loddo, G. Palmisano, L. Palmisano, F. Parrino and M. A. Puma, *Applied Catalysis B: Environmental*, 2012, **111-112**, 555-561.
2. A. Jha, K. R. Patil and C. V. Rode, *ChemPlusChem*, 2013, **78**, 1384-1392.
3. A. Jha and C. V. Rode, *New Journal of Chemistry*, 2013, **37**, 2669-2674.
4. A. Jha, D. Mhamane, A. Suryawanshi, S. M. Joshi, P. Shaikh, N. Biradar, S. Ogale and C. V. Rode, *Catalysis Science & Technology*, 2014, **4**, 1771-1778.
5. M. Shilpy, M. A. Ehsan, T. H. Ali, S. B. Abd Hamid and M. E. Ali, *RSC Advances*, 2015, **5**, 79644-79653.
6. J. Pan, J. Fu and X. Lu, *Energy and Fuels*, 2015, **29**, 4503-4509.
7. C. S. Hinde, D. Ansovini, P. P. Wells, G. Collins, S. V. Aswegen, J. D. Holmes, T. S. A. Hor and R. Raja, *ACS Catalysis*, 2015, **5**, 3807-3816.
8. S. Saha and S. B. A. Hamid, *RSC Advances*, 2017, **7**, 9914-9925.
9. K.-Y. A. Lin, H.-K. Lai and Z.-Y. Chen, *Journal of the Taiwan Institute of Chemical Engineers*, 2017, **78**, 337-343.

10. M. J. Sampaio, A. Benyounes, P. Serp, J. L. Faria and C. G. Silva, *Applied Catalysis A: General*, 2018, **551**, 71-78.
11. R. Behling, G. Chatel and S. Valange, *Ultrasonics Sonochemistry*, 2017, **36**, 27-35.
12. Z. Yuan, S. Chen and B. Liu, *Journal of Materials Science*, 2017, **52**, 164-172.
13. F. Saberi, D. Rodríguez-Padrón, E. Doustkhah, S. Ostovar, A. Franco, H. R. Shaterian and R. Luque, *Catalysis Communications*, 2019, **118**, 65-69.
14. H.-K. Lai, Y.-Z. Chou, M.-H. Lee and K.-Y. A. Lin, *Chemical Engineering Journal*, 2018, **332**, 717-726.
15. P. R. G. N. Reddy, B. G. Rao, T. V. Rao and B. M. Reddy, *Catalysis Letters*, 2019, **149**, 533-543.
16. B. Rahmanivahid, M. Pinilla-de Dios, M. Haghghi and R. Luque, *Molecules*, 2019, **24**, 2597.
17. M.-W. Zheng, H.-K. Lai and K.-Y. A. Lin, *Waste and Biomass Valorization*, 2019, **10**, 2933-2942.
18. M. Wu, J.-H. Pang, P.-P. Song, J.-J. Peng, F. Xu, Q. Li and X.-M. Zhang, *New Journal of Chemistry*, 2019, **43**, 1964-1971.
19. M. García-Bofill, P. W. Sutton, M. Guillén and G. Álvaro, *Applied Catalysis A: General*, 2019, **582**, 117117.
20. M.-W. Zheng, K.-Y. A. Lin and C.-H. Lin, *Waste and Biomass Valorization*, 2020, **11**, 6917-6928.
21. W. Sun, S. Wu, Y. Lu, Y. Wang, Q. Cao and W. Fang, *ACS Catalysis*, 2020, **10**, 7699-7709.
22. B.-C. Li, N. N. Huy, J.-Y. Lin, S. Phattarapattamawong, G. Lisak, H. Wang and K.-Y. A.

- Lin, *Journal of Environmental Chemical Engineering*, 2021, **9**, 106092.
23. W. Sun, P. Lin, Q. Tang, F. Jing, Q. Cao and W. Fang, *Catalysis Science & Technology*, 2021, **11**, 7268-7277.
24. A. Kumar and R. Srivastava, *ACS Applied Nano Materials*, 2021, **4**, 9080-9093.
25. P. Lin, R. Shang, Q. Zhang, B. Gu, Q. Tang, F. Jing, Q. Cao and W. Fang, *Catalysis Science & Technology*, 2022, **12**, 4613-4623.
26. N. C. Jana, S. Sethi, R. Saha and B. Bagh, *Green Chemistry*, 2022, **24**, 2542-2556.
